# Supplementary material
Source: publisher figshare collection journal article supplement (https://sage.figshare.com/ndownloader/files/35589306)
Supplement: Supplementary file 1 [file 35589306]

Supplemental Table 1. Items related to the TPB psychosocial factors and corresponding response options

| Psychosocial factor | Item                                                                                                | Response options                                                                    | Internal consistency<br>(Cronbach's $\alpha$ ) |
|---------------------|-----------------------------------------------------------------------------------------------------|-------------------------------------------------------------------------------------|------------------------------------------------|
| Attitudes           | 1. I feel that engaging in regular physical activity is necessary to me                             | Seven -point scale ranging from <i>not necessary</i> to <i>very necessary</i>       | .90                                            |
|                     | 2. I feel that engaging in regular physical activity is beneficial to me                            | Seven-point scale ranging from <i>harmful</i> to <i>beneficial</i>                  |                                                |
| Normative beliefs   | 1. In my daily life, others consider it important that I should engage in regular physical activity | Five-point scale ranging from <i>very much shouldn't</i> to <i>very much should</i> | .96                                            |
|                     | 2. In my daily life, others support my engagement in regular physical activity                      | Five-point scale ranging from <i>very unsupportive</i> to <i>very supportive</i>    |                                                |
| Control beliefs     | 1. In the next month, it is possible for me to exercise regularly                                   | Five-point scale ranging from <i>strongly disagree</i> to <i>strongly agree</i>     | .87                                            |
|                     | 2. In the next month, I will exercise regularly no matter what obstacles I encounter                | Five-point scale ranging from <i>strongly disagree</i> to <i>strongly agree</i>     |                                                |

Supplemental Table 2. Items of physical activity and corresponding response options

| Daily physical activity                                                                                  | Average exercise time (minutes) | Frequency of exercise | Degree of conscious breathing during exercise |                                |              |                    |
|----------------------------------------------------------------------------------------------------------|---------------------------------|-----------------------|-----------------------------------------------|--------------------------------|--------------|--------------------|
|                                                                                                          |                                 |                       | 1<br>Normal                                   | 2<br>Slightly faster breathing | 3<br>Panting | 4<br>Out of breath |
| Strolling                                                                                                |                                 |                       | 1                                             | 2                              | 3            | 4                  |
| Walking                                                                                                  |                                 |                       | 1                                             | 2                              | 3            | 4                  |
| Jogging                                                                                                  |                                 |                       | 1                                             | 2                              | 3            | 4                  |
| Running                                                                                                  |                                 |                       | 1                                             | 2                              | 3            | 4                  |
| Swimming                                                                                                 |                                 |                       | 1                                             | 2                              | 3            | 4                  |
| Recreational and social ball games (e.g., golf)                                                          |                                 |                       | 1                                             | 2                              | 3            | 4                  |
| Training and competition ball sports (e.g., basketball and table tennis)                                 |                                 |                       | 1                                             | 2                              | 3            | 4                  |
| Bicycling                                                                                                |                                 |                       | 1                                             | 2                              | 3            | 4                  |
| Hiking                                                                                                   |                                 |                       | 1                                             | 2                              | 3            | 4                  |
| Strength training (e.g., weight lifting, sit-ups, and push-ups)                                          |                                 |                       |                                               |                                |              |                    |
| Stair climbing                                                                                           |                                 |                       | 1                                             | 2                              | 3            | 4                  |
| Aerobic dance                                                                                            |                                 |                       | 1                                             | 2                              | 3            | 4                  |
| Yoga and pilates                                                                                         |                                 |                       | 1                                             | 2                              | 3            | 4                  |
| Folk dance, international standard                                                                       |                                 |                       | 1                                             | 2                              | 3            | 4                  |
| Barehanded exercises, stretching exercises, kung fu (such as Taijiquan, Yuanji dance, Wai Dan Gong etc.) |                                 |                       | 1                                             | 2                              | 3            | 4                  |
| Rope skipping                                                                                            |                                 |                       | 1                                             | 2                              | 3            | 4                  |
| Hula hoop                                                                                                |                                 |                       | 1                                             | 2                              | 3            | 4                  |
| Others : _____                                                                                           |                                 |                       | 1                                             | 2                              | 3            | 4                  |
| Others : _____                                                                                           |                                 |                       | 1                                             | 2                              | 3            | 4                  |
| Others : _____                                                                                           |                                 |                       | 1                                             | 2                              | 3            | 4                  |

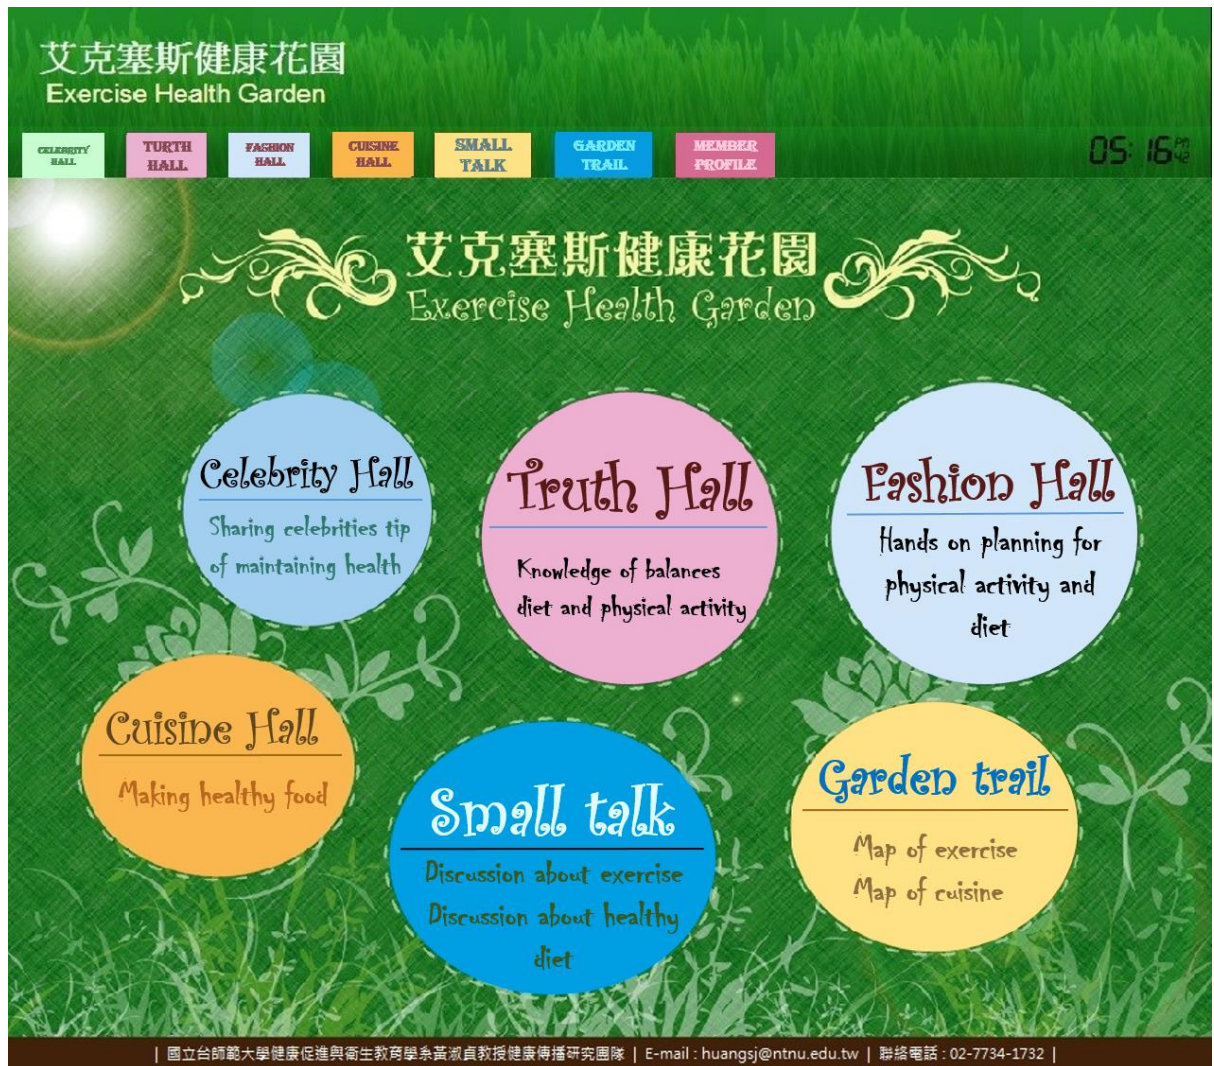

Supplemental Figure 1: Interface of Exercise Health Garden.
